# Supplementary material for: Transverse and Axial Resolution of Femtosecond Laser Surgery
Source: Research Square preprint supplement (doi:10.21203/rs.3.rs-406760/v1), 2021-04-13
Supplement: Supplementary file 1 [file 25dc7103a93c6e5f7a2d38c1.docx]

**
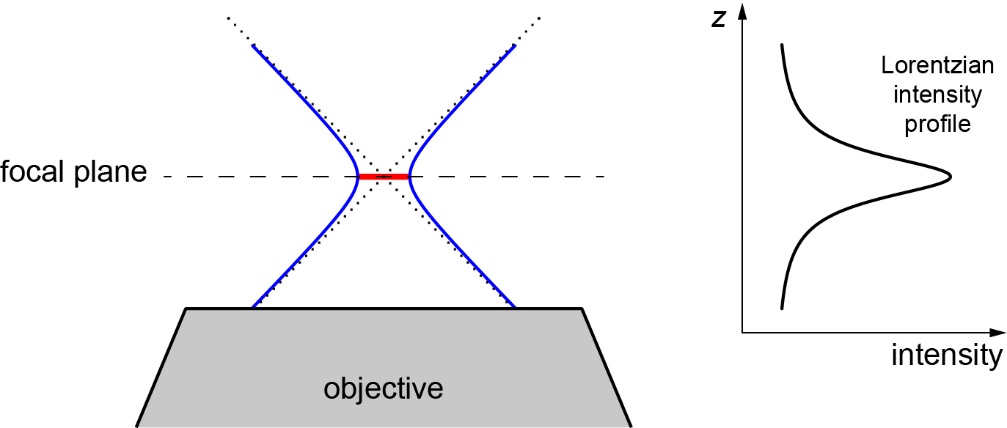
**

**Figure S1. Focused beam profiles.**

Focused beams are hyperboloid in the axial direction. Asymptotes indicated by dotted lines. Waist diameter indicated by red line on focal plane (dotted line). Corresponding intensity profile indicated to right of beam profile.
